# Supplementary material
Source: PubMed Central journal article supplement (PMC2740960)
Supplement: joa0215-0132-SD1.pdf [file joa0215-0132-SD1.pdf]

**Table 1: S-100 $\beta$  positive astrocyte density of primary visual cortex (V1)**

| Age | C                | DR               | DR-EE            | DR-EE-Ex         |
|-----|------------------|------------------|------------------|------------------|
| P21 | 17.72 $\pm$ 0.42 | 22.00 $\pm$ 1.01 | 11.65 $\pm$ 0.28 | 22.95 $\pm$ 0.59 |
| P28 | 16.68 $\pm$ 0.70 | 18.39 $\pm$ 0.95 | 14.30 $\pm$ 0.40 | 19.60 $\pm$ 0.43 |
| P35 | 16.83 $\pm$ 0.53 | 12.97 $\pm$ 0.38 | 11.14 $\pm$ 0.28 | 19.72 $\pm$ 0.47 |
| P42 | 15.29 $\pm$ 0.74 | 11.76 $\pm$ 0.43 | 13.25 $\pm$ 0.37 | 19.56 $\pm$ 0.47 |
| P49 | 16.33 $\pm$ 0.50 | 13.23 $\pm$ 0.43 | 11.92 $\pm$ 0.28 | 20.51 $\pm$ 0.68 |
| P56 | 15.48 $\pm$ 0.51 | 14.70 $\pm$ 0.59 | 12.07 $\pm$ 0.37 | 18.46 $\pm$ 0.73 |
| P63 | 16.36 $\pm$ 0.62 | 13.08 $\pm$ 0.38 | 13.13 $\pm$ 0.27 | 19.55 $\pm$ 0.49 |

| Age | <i>F</i> | df | C vs DR |       | C vs DR-EE |       | C vs DR-EE-Ex |       | DR vs DR-EE |       | DR vs DR-EE-Ex |       | DR-EE vs DR-EE-Ex |       |
|-----|----------|----|---------|-------|------------|-------|---------------|-------|-------------|-------|----------------|-------|-------------------|-------|
|     |          |    | %Dif    | p     | %Dif       | p     | %Dif          | p     | %Dif        | p     | %Dif           | p     | %Dif              | p     |
| P21 | 64.726   | 3  | 24.15   | 0.002 | -34.25     | 0.000 | 29.51         | 0.000 | -47.04      | 0.000 | 4.32           | 0.961 | 97.00             | 0.000 |
| P28 | 20.168   | 3  | 10.25   | 0.632 | -14.26     | 0.024 | 17.50         | 0.004 | -22.24      | 0.002 | 6.58           | 0.830 | 37.06             | 0.000 |
| P35 | 88.906   | 3  | -22.93  | 0.000 | -33.80     | 0.000 | 17.17         | 0.001 | -14.10      | 0.001 | 52.04          | 0.000 | 77.02             | 0.000 |
| P42 | 49.884   | 3  | -23.08  | 0.000 | -13.34     | 0.024 | 27.93         | 0.000 | 12.67       | 0.119 | 66.33          | 0.000 | 47.62             | 0.000 |
| P49 | 37.736   | 3  | -18.98  | 0.000 | -27.00     | 0.000 | 25.60         | 0.000 | -9.90       | 0.070 | 55.03          | 0.000 | 72.06             | 0.000 |
| P56 | 23.760   | 3  | -5.03   | 1.000 | -22.02     | 0.000 | 19.25         | 0.001 | -17.89      | 0.003 | 25.58          | 0.000 | 52.94             | 0.000 |
| P63 | 181.186  | 3  | -20.04  | 0.000 | -19.74     | 0.000 | 19.50         | 0.001 | 0.38        | 1.000 | 49.46          | 0.000 | 48.90             | 0.000 |

**Table 1:** S-100 $\beta$  positive astrocyte density per 62,500  $\mu\text{m}^2$  of primary visual cortex for C, DR, DR-EE and DR-EE-Ex groups in each of the ages considered (mean number of S-100 $\beta$  positive cells per 62,500  $\mu\text{m}^2$  of primary visual cortex  $\pm$  SEM; percentage of difference and statistical significance, p value, *F* value and degree of freedom) (1-way ANOVA test with post-hoc correction).

**Table 2: S-100 $\beta$  positive astrocyte density of primary somatosensory cortex barrel field (S1BF)**

| Age | C                | DR               | DR-EE            | DR-EE-Ex         |
|-----|------------------|------------------|------------------|------------------|
| P21 | 13.23 $\pm$ 0.31 | 12.58 $\pm$ 0.38 | 19.01 $\pm$ 0.36 | 20.86 $\pm$ 0.41 |
| P28 | 11.92 $\pm$ 0.34 | 13.17 $\pm$ 0.32 | 14.55 $\pm$ 0.32 | 19.60 $\pm$ 0.29 |
| P35 | 12.32 $\pm$ 0.33 | 13.78 $\pm$ 0.33 | 15.20 $\pm$ 0.28 | 17.26 $\pm$ 0.28 |
| P42 | 11.40 $\pm$ 0.26 | 13.03 $\pm$ 0.28 | 13.44 $\pm$ 0.94 | 17.90 $\pm$ 0.43 |
| P49 | 11.30 $\pm$ 0.30 | 13.14 $\pm$ 0.31 | 14.07 $\pm$ 0.34 | 15.87 $\pm$ 0.36 |
| P56 | 12.04 $\pm$ 0.32 | 13.68 $\pm$ 0.41 | 14.13 $\pm$ 0.37 | 16.38 $\pm$ 0.39 |
| P63 | 12.44 $\pm$ 0.29 | 11.49 $\pm$ 0.27 | 14.99 $\pm$ 0.37 | 16.56 $\pm$ 0.41 |

| Age | <i>F</i> | df | C vs DR |       | C vs DR-EE |       | C vs DR-EE-Ex |       | DR vs DR-EE |       | DR vs DR-EE-Ex |       | DR-EE vs DR-EE-Ex |       |
|-----|----------|----|---------|-------|------------|-------|---------------|-------|-------------|-------|----------------|-------|-------------------|-------|
|     |          |    | %Dif    | p     | %Dif       | p     | %Dif          | p     | %Dif        | p     | %Dif           | p     | %Dif              | p     |
| P21 | 108.985  | 3  | -4.91   | 0.703 | 43.69      | 0.000 | 57.67         | 0.000 | 51.11       | 0.000 | 65.82          | 0.000 | 9.73              | 0.005 |
| P28 | 121.424  | 3  | 10.49   | 0.097 | 22.06      | 0.000 | 64.43         | 0.000 | 10.48       | 0.021 | 48.82          | 0.000 | 34.71             | 0.000 |
| P35 | 47.756   | 3  | 11.85   | 0.014 | 23.38      | 0.000 | 40.10         | 0.000 | 10.30       | 0.006 | 25.25          | 0.000 | 13.55             | 0.000 |
| P42 | 17.789   | 3  | 14.30   | 0.498 | 17.89      | 0.123 | 57.02         | 0.000 | 3.15        | 1.000 | 37.38          | 0.000 | 33.18             | 0.000 |
| P49 | 30.553   | 3  | 16.28   | 0.000 | 24.51      | 0.000 | 40.44         | 0.000 | 7.08        | 0.248 | 20.78          | 0.000 | 12.79             | 0.002 |
| P56 | 22.782   | 3  | 13.62   | 0.020 | 17.36      | 0.001 | 36.05         | 0.000 | 3.29        | 1.000 | 19.74          | 0.000 | 15.92             | 0.000 |
| P63 | 47.184   | 3  | -7.63   | 0.099 | 20.50      | 0.000 | 33.12         | 0.000 | 30.46       | 0.000 | 44.13          | 0.000 | 10.47             | 0.029 |

**Table 2:** S-100 $\beta$  positive astrocyte density per 62,500  $\mu\text{m}^2$  of primary somatosensory cortex barrel field for C, DR, DR-EE and DR-EE-Ex groups in each of the ages considered (mean number of S-100 $\beta$  positive cells per 62,500  $\mu\text{m}^2$  of primary somatosensory cortex, barrel field  $\pm$  SEM; percentage of difference and statistical significance, p value, *F* value and degree of freedom) (1-way ANOVA test with post-hoc correction).

**Table 3: Primary visual cortex (V1) layer IV volume (mm<sup>3</sup>)**

| Age | C                 | DR                | DR-EE             | DR-EE-Ex          |
|-----|-------------------|-------------------|-------------------|-------------------|
| P21 | 0.549 $\pm$ 0.012 | 0.525 $\pm$ 0.020 | 0.656 $\pm$ 0.049 | 0.596 $\pm$ 0.016 |
| P28 | 0.394 $\pm$ 0.020 | 0.266 $\pm$ 0.013 | 0.281 $\pm$ 0.011 | 0.297 $\pm$ 0.007 |
| P35 | 0.399 $\pm$ 0.024 | 0.254 $\pm$ 0.016 | 0.273 $\pm$ 0.010 | 0.257 $\pm$ 0.012 |
| P42 | 0.356 $\pm$ 0.023 | 0.272 $\pm$ 0.006 | 0.282 $\pm$ 0.011 | 0.257 $\pm$ 0.010 |
| P49 | 0.331 $\pm$ 0.011 | 0.261 $\pm$ 0.009 | 0.253 $\pm$ 0.006 | 0.247 $\pm$ 0.011 |
| P56 | 0.319 $\pm$ 0.010 | 0.283 $\pm$ 0.009 | 0.261 $\pm$ 0.004 | 0.277 $\pm$ 0.003 |
| P63 | 0.313 $\pm$ 0.008 | 0.244 $\pm$ 0.009 | 0.254 $\pm$ 0.006 | 0.273 $\pm$ 0.008 |

| Age | <i>F</i> | df | C vs DR |       | C vs DR-EE |       | C vs DR-EE-Ex |       | DR vs DR-EE |       | DR vs DR-EE-Ex |       | DR-EE vs DR-EE-Ex |       |
|-----|----------|----|---------|-------|------------|-------|---------------|-------|-------------|-------|----------------|-------|-------------------|-------|
|     |          |    | %Dif    | p     | %Dif       | p     | %Dif          | p     | %Dif        | p     | %Dif           | p     | %Dif              | p     |
| P21 | 4.119    | 3  | -4.37   | 0.906 | 19.49      | 0.405 | 8.56          | 0.259 | 24.95       | 0.239 | 13.52          | 0.123 | -9.14             | 0.872 |
| P28 | 17.342   | 3  | -32.48  | 0.000 | -28.68     | 0.000 | -24.61        | 0.000 | 5.64        | 1.000 | 11.65          | 0.728 | 5.69              | 1.000 |
| P35 | 18.314   | 3  | -36.34  | 0.004 | -31.57     | 0.011 | -35.58        | 0.005 | 7.48        | 0.903 | 1.18           | 1.000 | -5.86             | 0.904 |
| P42 | 9.589    | 3  | -23.59  | 0.082 | -20.78     | 0.130 | -27.80        | 0.037 | 3.68        | 0.976 | -5.51          | 0.834 | -8.86             | 0.584 |
| P49 | 17.774   | 3  | -21.14  | 0.000 | -23.56     | 0.000 | -25.37        | 0.000 | -3.06       | 1.000 | -5.36          | 1.000 | -2.37             | 1.000 |
| P56 | 12.246   | 3  | -9.58   | 0.115 | -18.18     | 0.007 | -13.16        | 0.035 | -7.77       | 0.316 | -2.12          | 0.993 | 6.13              | 0.049 |
| P63 | 15.077   | 3  | -22.04  | 0.000 | -18.84     | 0.000 | -12.77        | 0.010 | 4.10        | 1.000 | 11.89          | 0.110 | 7.48              | 0.649 |

**Table 3:** Primary visual cortex (V1) layer IV volume (mm<sup>3</sup>) for C, DR, DR-EE and DR-EE-Ex groups in each of the ages considered (mean number of V1 layer IV volume mm<sup>3</sup>  $\pm$  SEM; percentage of difference and statistical significance, p value, *F* value and degree of freedom) (1-way ANOVA test with post-hoc correction).

**Table 4: Primary somatosensory cortex barrel field (S1BF) volume (mm<sup>3</sup>)**

| Age | C                 | DR                | DR-EE             | DR-EE-Ex          |
|-----|-------------------|-------------------|-------------------|-------------------|
| P21 | 0.508 $\pm$ 0.014 | 0.681 $\pm$ 0.028 | 0.673 $\pm$ 0.032 | 0.632 $\pm$ 0.027 |
| P28 | 0.648 $\pm$ 0.022 | 0.554 $\pm$ 0.017 | 0.817 $\pm$ 0.033 | 0.884 $\pm$ 0.050 |
| P35 | 0.652 $\pm$ 0.022 | 0.636 $\pm$ 0.027 | 0.960 $\pm$ 0.044 | 0.905 $\pm$ 0.055 |
| P42 | 0.530 $\pm$ 0.022 | 1.064 $\pm$ 0.028 | 0.960 $\pm$ 0.024 | 0.973 $\pm$ 0.033 |
| P49 | 0.494 $\pm$ 0.013 | 0.868 $\pm$ 0.041 | 0.920 $\pm$ 0.037 | 0.948 $\pm$ 0.050 |
| P56 | 0.598 $\pm$ 0.025 | 0.978 $\pm$ 0.086 | 0.783 $\pm$ 0.017 | 0.936 $\pm$ 0.038 |
| P63 | 0.616 $\pm$ 0.025 | 0.678 $\pm$ 0.023 | 0.591 $\pm$ 0.013 | 0.656 $\pm$ 0.022 |

| Age | <i>F</i> | df | C vs DR |       | C vs DR-EE |       | C vs DR-EE-Ex |       | DR vs DR-EE |       | DR vs DR-EE-Ex |       | DR-EE vs DR-EE-Ex |       |
|-----|----------|----|---------|-------|------------|-------|---------------|-------|-------------|-------|----------------|-------|-------------------|-------|
|     |          |    | % Dif   | p     | % Dif      | p     | % Dif         | p     | % Dif       | p     | % Dif          | p     | % Dif             | p     |
| P21 | 10.109   | 3  | 34.06   | 0.001 | 32.48      | 0.001 | 24.41         | 0.035 | -1.17       | 1.000 | -7.19          | 1.000 | -6.09             | 1.000 |
| P28 | 21.053   | 3  | -14.50  | 0.044 | 26.08      | 0.013 | 36.42         | 0.022 | 47.47       | 0.001 | 59.57          | 0.004 | 8.20              | 0.878 |
| P35 | 18.419   | 3  | -2.45   | 1.000 | 47.24      | 0.000 | 38.80         | 0.001 | 50.94       | 0.000 | 42.30          | 0.001 | -5.72             | 1.000 |
| P42 | 53.057   | 3  | 100.75  | 0.000 | 81.13      | 0.000 | 83.58         | 0.000 | -9.77       | 0.218 | -8.55          | 0.383 | 1.35              | 1.000 |
| P49 | 31.276   | 3  | 75.71   | 0.000 | 86.23      | 0.000 | 91.90         | 0.000 | 5.99        | 1.000 | 9.22           | 0.910 | 3.04              | 1.000 |
| P56 | 12.216   | 3  | 63.55   | 0.033 | 30.94      | 0.001 | 56.52         | 0.000 | -19.93      | 0.359 | -4.29          | 0.999 | 19.54             | 0.048 |
| P63 | 3.419    | 3  | 10.06   | 0.310 | -4.05      | 1.000 | 6.49          | 1.000 | -12.83      | 0.053 | -3.24          | 1.000 | 10.99             | 0.245 |

**Table 4:** Primary somatosensory cortex barrel field (S1BF) volume (mm<sup>3</sup>) for C, DR, DR-EE and DR-EE-Ex groups in each of the ages considered (mean number of S1BF volume mm<sup>3</sup>  $\pm$  SEM; percentage of difference and statistical significance, p value, *F* value and degree of freedom) (1-way ANOVA test with post-hoc correction).
